# Supplementary material for: Controllable stationary photocurrents generated from a bacteriorhodopsin/upconversion nanoparticle-based bionanosystem under NIR illumination
Source: Royal Society of Chemistry journal article supplement (doi:10.1039/c6nr06930d), 2016-01-01
Supplement: c6nr06930d1.pdf [file c6nr06930d1.pdf]

# **Controllable stationary photocurrent generated from a bacteriorhodopsin/upconversion nanoparticles-based bionanosystem under NIR illumination**

Zhisong Lu<sup>a,b\*</sup>, Jing Wang<sup>a,b</sup>, Rui Li<sup>c</sup>, Yan Qiao<sup>a,b</sup>, Mengyao Zhou<sup>a,b</sup> and Chang Ming Li<sup>a,b,d\*</sup>

<sup>a</sup> Chongqing Key Laboratory for Advanced Materials & Technologies of Clean Energies, 1 Tiansheng Road, Chongqing 400715, P. R. China

<sup>b</sup> Institute for Clean Energy & Advanced Materials, Faculty of Materials and Energy, Southwest University, 1 Tiansheng Road, Chongqing 400715, P. R. China.

<sup>c</sup> Hubei Key Laboratory of Genetic Regulation and Integrative Biology, School of Life Sciences, Central China Normal University, Wuhan 430079, P. R. China

<sup>d</sup> Institute for Materials Science and Devices, Suzhou University of Science and Technology, Suzhou 215011, P.R. China

\*: Authors to whom correspondence should be addressed. Tel.: +86-23-68254732; Fax: +86-23-68254969. E-mail: [ecmli@swu.edu.cn](mailto:ecmli@swu.edu.cn) (CM Li) or [zslu@swu.edu.cn](mailto:zslu@swu.edu.cn) (ZS Lu).

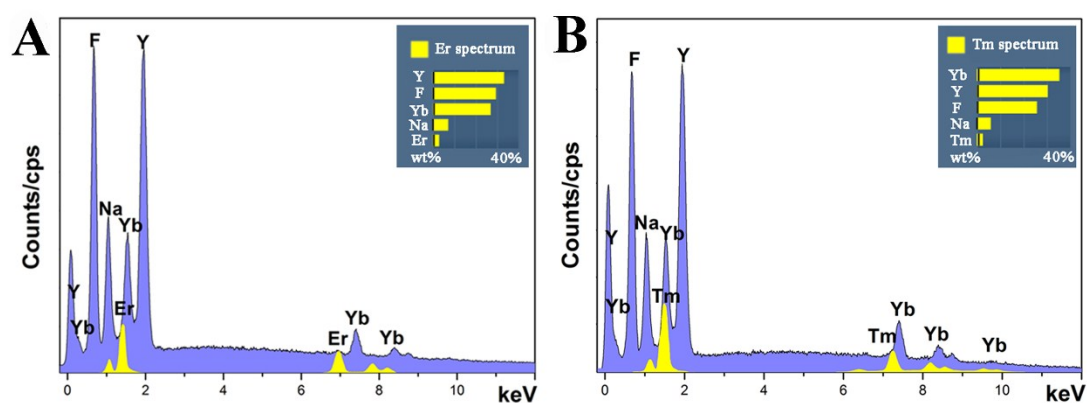

**Figure S1.** EDS spectra of NaYF<sub>4</sub>:Yb, Er (A) and NaYF<sub>4</sub>:Yb, Tm (B) upconversion nanoparticles.

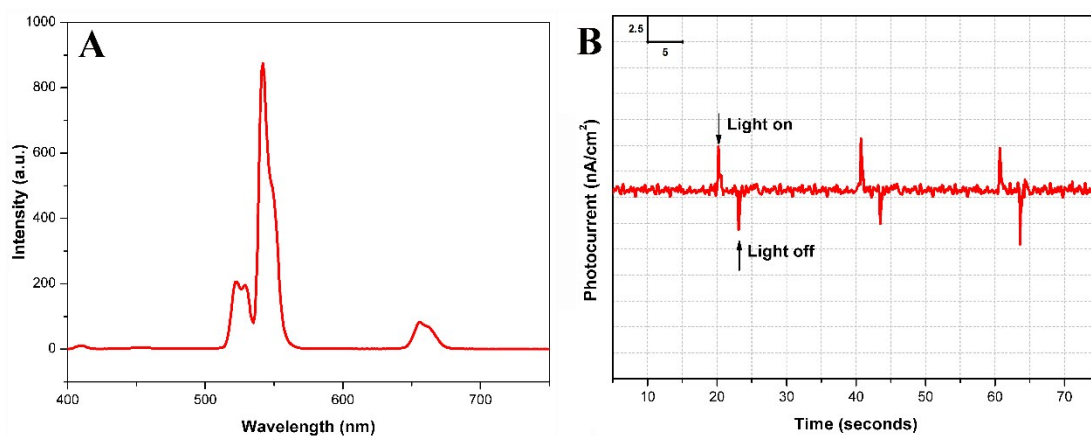

**Figure S2.** Photoluminescence spectrum of NaYF<sub>4</sub>:Yb, Er suspension (A) and photocurrents of the bR/UCNPs bionanosystem prepared with NaYF<sub>4</sub>:Yb, Er UCNPs (B).

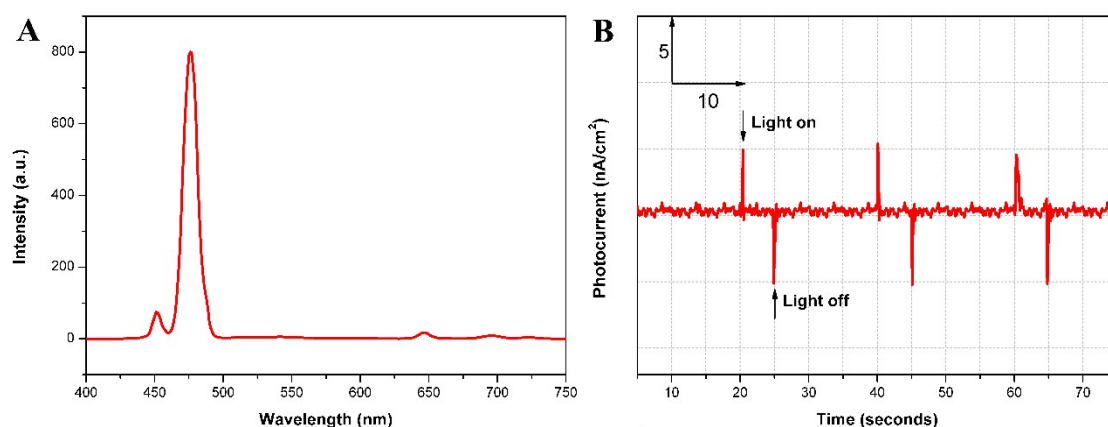

**Figure S3.** Photoluminescence spectrum of NaYF<sub>4</sub>:Yb, Tm suspension (A) and photocurrents of the bR/UCNPs bionanosystem prepared with NaYF<sub>4</sub>:Yb, Tm UCNPs (B).

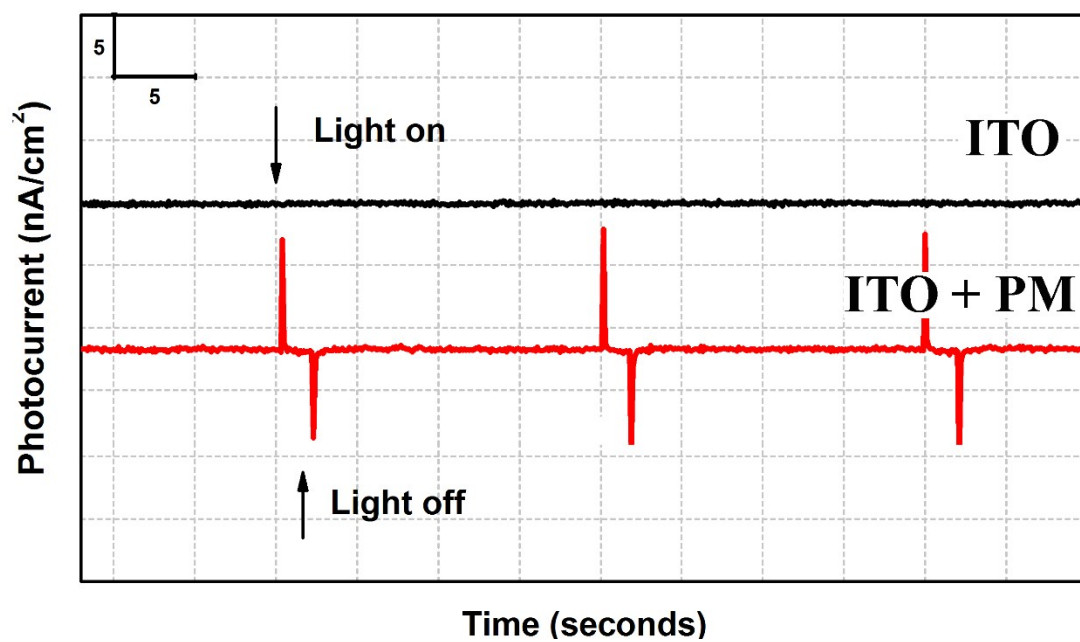

**Figure S4.** photocurrents of the ITO electrode and PM-deposited ITO electrode to green irradiation.
